# Supplementary material
Source: PubMed Central journal article supplement (PMC3831074)
Supplement: ejhg201358x2.pdf [file ejhg201358x2.pdf]

## Supplemental Table 1

### Filtering Steps

| <b><u>Method</u></b>        | <b><u>Filter</u></b> | <b><u>CNVs remaining</u></b> |
|-----------------------------|----------------------|------------------------------|
| QuantiSNP                   | logBayes >7          | 152 225                      |
| Cartagenia                  | >3 SNPs              | 1 817                        |
|                             | gene content         |                              |
|                             | <i>de novo</i>       |                              |
|                             | control individuals  |                              |
| external Databases          | RefSeqGenes          | 367                          |
|                             | DGV                  |                              |
|                             | DECIPHER             |                              |
| GenomeStudio                | visual inspection    | 5                            |
| <i>de novo</i> Confirmation | qPCR                 | 3                            |
