# Supplementary material
Source: PubMed Central journal article supplement (PMC3831074)
Supplement: ejhg201358x3.pdf [file ejhg201358x3.pdf]

## Supplemental Table 2

### Primers used for qPCR

#### A) *de novo* CNVs:

chr1:215,945,774-216,077,064

| PCR-product | primer (5' -> 3')     |
|-------------|-----------------------|
| 1R_SPATA17  | ATGGTTTTGATGCAGGAAGG  |
|             | TGCTTTGTGCTGAGGAGGTA  |
| 2R_SPATA17  | CCCTTCAGAAAAGAGCCTGA  |
|             | GCCAATCAGTAAGGCTGGTG  |
| 3R_SPATA17  | AAAGATGGTGTCTGCTGACCT |
|             | GGTCATATGCCAAAGCCAAT  |
| 4R_SPATA17  | TGTTTGCCCTAGATGTGCAG  |
|             | TCAGGGATCACATTGGGACT  |

chr2:241,202,666-241,227,781

| PCR-product | primer (5' -> 3')    |
|-------------|----------------------|
| 1R GPR35    | CCGACATACCTGTTGGGTTC |
|             | CAGCCATACAGGCTGGACTT |
| 2R GPR35    | CCTTGGGAGAGATGCTGAGT |
|             | TGACCCAATAACCCCACTTC |
| 3R GPR35    | AGACCCGCATCTACATGACC |
|             | AGGTAGATGCCCTGGGAGAG |

chr8:145,012,210-145,132,100

| PCR-product | primer (5' -> 3')    |
|-------------|----------------------|
| 1R_EPPK1    | ATGGCCTCAGAGAAGAGCAG |
|             | GGACCCCATTCATCAAGTA  |
| 2R_EPPK1    | CACTCTCTCCTGCCCTTCAG |
|             | CGCAGAGAAGGACTCAGGAC |
| 3R_PLEC-1   | GCTCTGCCGTGAAGTATTCC |
|             | GGGGAGCTGGTCTACTGA   |
| 4R_PARP10   | AGAGCCCATTGTCACAGTCC |
|             | AGCTGGCTGAGAACACCAGT |

**B) inherited CNVs:**

chr13:995,983,04-996,089,44 (paternaly inherited)

| PCR-product | primer (5' -> 3')     |
|-------------|-----------------------|
| 1R_PCCA     | GACTGGCCGGGTTATGTAAG  |
|             | CCTTCTGATGTCCTTCAATGC |
| 2R_PCCA     | GGATGAGGCTGTCTGTGTTG  |
|             | TCATTCAGACTCACAGCTTGG |
| 3R_PCCA     | CAGGTTATGGATTCTTTCAGA |
|             | CCACATTTACAAAGCCATGC  |

chr8:623,420,19-623,699,81 (maternaly inherited)

| PCR-product | primer (5' -> 3')    |
|-------------|----------------------|
| 1R_CLVS1    | TTGTTACAGTGGGAATGGA  |
|             | TTACTCTGGCCATGGGCTAT |
| 2R_CLVS1    | GGGAAAGCTAGGCTCCGTAT |
|             | ATCCCCTATTCTGGCAGGTT |
| 3R_CLVS1    | TCAGATTTGGAAGGCGAGAT |
|             | AGCCTGGCAGAATGGAGTTA |
