# Supplementary material
Source: PubMed Central journal article supplement (PMC3831074)
Supplement: ejhg201358x4.pdf [file ejhg201358x4.pdf]

### Supplemental Table 3

CNVs found in DGV with partial overlap of the three duplicated regions of interest (1q41, 2q37.3, 8q24.3)

| Number of described CNVs<br>(examined cases in total) | Deletion/Duplication  | Complete or partial<br>overlapping regions | Size       | References |
|-------------------------------------------------------|-----------------------|--------------------------------------------|------------|------------|
| <b>chr1:215,945,774-216,077,064</b>                   |                       |                                            |            |            |
| 1 (1)                                                 | Duplication           | partial                                    | 3,216 bp   | 1          |
| 1 (1)                                                 | Deletion              | partial                                    | 313 bp     | 1          |
| 1 (1)                                                 | Duplication           | partial                                    | 1 bp       | 2          |
| 1 (1)                                                 | Deletion              | partial                                    | 314 bp     | 2          |
| 1 (1)                                                 | Deletion              | partial                                    | 807 bp     | 3          |
| <b>chr2:241,202,666-241,227,781</b>                   |                       |                                            |            |            |
| 1 (270)                                               | Deletion/Duplication* | complete                                   | 223,751 bp | 4          |
| 1 (30)                                                | Duplication           | partial                                    | 7,321 bp   | 5          |
| 1 (1)                                                 | Duplication           | partial                                    | 1,121 bp   | 6          |
| 3 (39)                                                | Deletion              | partial                                    | 1,121 bp   | 7          |
| 1 (1)                                                 | Duplication           | partial                                    | 1 bp       | 2          |
| <b>chr8:145,012,210-145,132,100</b>                   |                       |                                            |            |            |
| 4 (30)                                                | Duplication           | partial                                    | 18,827 bp  | 8          |
| 1 (30)                                                | Deletion              | partial                                    | 18,827 bp  | 8          |
| 3 (1854)                                              | Deletion              | complete                                   | 288,952 bp | 9          |

|          |             |         |            |    |
|----------|-------------|---------|------------|----|
| 1 (1)    | Duplication | partial | 12,354 bp  | 10 |
| 1 (1)    | Duplication | partial | 19,170 bp  | 10 |
| 1 (1)    | Duplication | partial | 13,136 bp  | 10 |
| 1 (1)    | Duplication | partial | 12,032 bp  | 10 |
| 1 (1)    | Duplication | partial | 6,612 bp   | 10 |
| 1 (1)    | Duplication | partial | 2,895 bp   | 10 |
| 1 (30)   | Duplication | partial | 3,543 bp   | 8  |
| 4(30)    | Duplication | partial | 1,509 bp   | 8  |
| 1 (1)    | Duplication | partial | 1,069 bp   | 10 |
| 1 (1)    | Duplication | partial | 5,392 bp   | 10 |
| 1 (1)    | Duplication | partial | 1 bp       | 2  |
| 1 (36)   | Deletion    | partial | 121 bp     | 11 |
| 1 (30)   | Duplication | partial | 38,482 bp  | 8  |
| 1 (30)   | Duplication | partial | 5,615 bp   | 8  |
| 1 (30)   | Duplication | partial | 1,646 bp   | 8  |
| 1 (485)  | Deletion    | partial | 131,328 bp | 12 |
| 2 (485)  | Deletion    | partial | 651,337 bp | 12 |
| 3 (485)  | Deletion    | partial | 420,471 bp | 12 |
| 8 (485)  | Deletion    | partial | 183,427 bp | 12 |
| 5 (485)  | Deletion    | partial | 89,147 bp  | 12 |
| 8 (2026) | Deletion    | partial | 67,323 bp  | 13 |
| 1 (30)   | Deletion    | partial | 776 bp     | 8  |

|          |             |         |           |    |
|----------|-------------|---------|-----------|----|
| 2 (2026) | Deletion    | partial | 52,239 bp | 13 |
| 2 (2026) | Deletion    | partial | 11,168 bp | 13 |
| 1 (112)  | Deletion    | partial | 11,168 bp | 14 |
| 3 (30)   | Duplication | partial | 6,171 bp  | 8  |
| 1 (30)   | Deletion    | partial | 6,171 bp  | 8  |
| 1 (1)    | Deletion    | partial | 6,072 bp  | 15 |

\* Number of duplications or deletions not specified.

## References

- 1 Pang AW, MacDonald JR, Pinto D *et al*: Towards a comprehensive structural variation map of an individual human genome. *Genome Biol* 2010; **11**: R52.
- 2 Levy S, Sutton G, Ng PC *et al*: The diploid genome sequence of an individual human. *PLoS Biol* 2007; **5**: e254.
- 3 Ahn SM, Kim TH, Lee S *et al*: The first Korean genome sequence and analysis: full genome sequencing for a socio-ethnic group. *Genome Res* 2009; **19**: 1622-1629.
- 4 Redon R, Ishikawa S, Fitch KR *et al*: Global variation in copy number in the human genome. *Nature* 2006; **444**: 444-454.
- 5 Perry GH, Ben-Dor A, Tsalenko A *et al*: The fine-scale and complex architecture of human copy-number variation. *Am J Hum Genet* 2008; **82**: 685-695.
- 6 Ju YS, Hong D, Kim S *et al*: Reference-unbiased copy number variant analysis using CGH microarrays. *Nucleic Acids Res* 2010; **38**: e190.

- 7 Conrad DF, Pinto D, Redon R *et al*: Origins and functional impact of copy number variation in the human genome. *Nature* 2010; **464**: 704-712.
- 8 Park H, Kim JI, Ju YS, *et al*: Discovery of common Asian copy number variants using integrated high-resolution array CGH and massively parallel DNA sequencing. *Nat Genet* 2010; **42**: 400-405.
- 9 Itsara A, Cooper GM, Baker C *et al*: Population analysis of large copy number variants and hotspots of human genetic disease. *Am J Hum Genet* 2009; **84**: 148-161.
- 10 Kidd JM, Cooper GM, Donahue WF *et al*: Mapping and sequencing of structural variation from eight human genomes. *Nature* 2008; **453**: 56-64.
- 11 Mills RE, Luttig CT, Larkins CE *et al*: An initial map of insertion and deletion (INDEL) variation in the human genome. *Genome Res* 2006; **16**: 1182-1190.
- 12 Jakobsson M, Scholz SW, Scheet P *et al*: Genotype, haplotype and copy-number variation in worldwide human populations. *Nature* 2008; **451**: 998-1003.
- 13 Shaikh TH, Gai X, Perin JC *et al*: High-resolution mapping and analysis of copy number variations in the human genome: a data resource for clinical and research applications. *Genome Res* 2009; **19**: 1682-1690.
- 14 Wang K, Li M, Hadley D *et al*: PennCNV: an integrated hidden Markov model designed for high-resolution copy number variation detection in whole-genome SNP genotyping data. *Genome Res* 2007; **17**: 1665-1674.
- 15 Kim JI, Ju YS, Park H *et al*: A highly annotated whole-genome sequence of a Korean individual. *Nature* 2009; **460**: 1011-1015.
